# Supplementary material for: Current Emergency Medical Service Vasoactive Use for the Management of Shock
Source: PubMed Central journal article supplement — Crit Care Explor. 2024 Nov 21;6(12):e1177. doi: 10.1097/CCE.0000000000001177 (PMC11584219; doi:10.1097/cce.0000000000001177), 2024-11-21
Supplement: cc9-6-e1177-s001.pdf [file cc9-6-e1177-s001.pdf]

# Supplementary material

## Contents

|                       |   |
|-----------------------|---|
| Survey questions..... | 2 |
|-----------------------|---|

# Survey questions

1. EMS location/region
2. How many EMS providers are employed by your service?
3. Does your service employ critical care/intensive care paramedics?
  - i. Yes
  - ii. No
4. Can your EMS providers administer vasoactive medication infusions?
  - i. Yes
  - ii. No
5. Which EMS provider is accredited to administer these agents in your service?
  - i. Medical doctor
  - ii. Critical care/Intensive care paramedic
  - iii. Advanced life support paramedics
  - iv. Basic life support paramedic
  - v. Other – enter free text
6. Prior to initiating a vasoactive infusion is a trial of fluid administration required?
  - i. Yes
  - ii. No
7. How much fluid is administered prior to initiating vasoactive infusions?
  - i. 10ml/kg
  - ii. 20ml/kg
  - iii. 30ml/kg
  - iv. Undefined
  - v. Other – enter free text
8. Does your service have guidelines relating to hemodynamic parameters at which vasoactive infusions should be commenced?
  - i. Yes
  - ii. No
9. Which blood pressure measurement would result in a vasoactive infusion being commenced by EMS?
  - i. Systolic blood pressure <80mmHg
  - ii. Systolic blood pressure >80mmHg and <90mmHg
  - iii. Systolic blood pressure >90mmHg and <100mmHg
  - iv. Other – enter free text
10. In addition to hypotension, which other parameters would prompt EMS providers to commence a vasoactive infusion based on your service's guidelines?
  - i. Tachycardia
  - ii. Cool peripheries
  - iii. Elevated lactate
  - iv. Abnormal mentation

- v. No additional parameters
  - vi. Other
11. What is the first line vasoactive agent for infusion in patients with suspected sepsis?
- i. Epinephrine
  - ii. Norepinephrine
  - iii. Metaraminol
  - iv. Dopamine
  - v. Phenylephrine
  - vi. Dobutamine
  - vii. Other – enter free text
12. What is the target blood pressure in suspected sepsis?
- i. Systolic blood pressure <80mmHg
  - ii. Systolic blood pressure >80mmHg and <90mmHg
  - iii. Systolic blood pressure >90mmHg and <100mmHg
  - iv. No specific target
  - v. Other – enter free text
13. What is the first line vasoactive agent for infusion in patients with suspected cardiogenic shock?
- i. Epinephrine
  - ii. Norepinephrine
  - iii. Metaraminol
  - iv. Dopamine
  - v. Phenylephrine
  - vi. Dobutamine
  - vii. Other – enter free text
14. What is the target blood pressure in suspected cardiogenic shock?
- i. Systolic blood pressure <80mmHg
  - ii. Systolic blood pressure >80mmHg and <90mmHg
  - iii. Systolic blood pressure >90mmHg and <100mmHg
  - iv. No specific target
  - v. Other – enter free text
15. What is the first line vasoactive agent for infusion following return of spontaneous circulation (ROSC) in cardiac arrest?
- i. Epinephrine
  - ii. Norepinephrine
  - iii. Metaraminol
  - iv. Dopamine
  - v. Phenylephrine
  - vi. Dobutamine
  - vii. Other – enter free text
16. What is the target blood pressure in cardiac arrest?
- i. Systolic blood pressure <80mmHg

- ii. Systolic blood pressure >80mmHg and <90mmHg
- iii. Systolic blood pressure >90mmHg and <100mmHg
- iv. No specific target
- v. Other – enter free text

17. What is the first line vasoactive agent for infusion in patients with undifferentiated shock?

- i. Epinephrine
- ii. Norepinephrine
- iii. Metaraminol
- iv. Dopamine
- v. Phenylephrine
- vi. Dobutamine
- vii. Other – enter free text

18. What is the target blood pressure in undifferentiated shock?

- i. Systolic blood pressure <80mmHg
- ii. Systolic blood pressure >80mmHg and <90mmHg
- iii. Systolic blood pressure >90mmHg and <100mmHg
- iv. No specific target
- v. Other – enter free text

19. Does your service commence a second line vasoactive infusion in the event of refractory shock?

- i. Yes
- ii. No

20. What agent is the second line vasoactive infusion used by your service?

- i. Epinephrine
- ii. Norepinephrine
- iii. Metaraminol
- iv. Dopamine
- v. Phenylephrine
- vi. Dobutamine
- vii. Other – enter free text
